# Supplementary material
Source: PubMed Central journal article supplement (PMC5850839)
Supplement: msx189_sup.pdf [file msx189_sup.pdf]

## **Impact of recombination on the base composition of Bacteria and Archaea**

### Supplementary Material

Louis-Marie Bobay and Howard Ochman

Table of content:

Figure S1. Comparison of nucleotide changes introduced by recombination and mutation at each codon position.

Figure S2. Equilibrium GC content relative to actual GC content.

Figure S3. Equilibrium GC content inferred from new polymorphisms relative to actual GC content at each codon position.

Figure S4. Impact of recombination and mutations on genomic nucleotide composition and codon usage.

Figure S5. Distribution of average bootstrap values for the species phylogenies.

Figure S6. Nucleotide bias of recent recombinant alleles and recent mutations.

Table S1. Description of species and core genome information.

Table S2. Identifying recombinant alleles in simulated data sets.

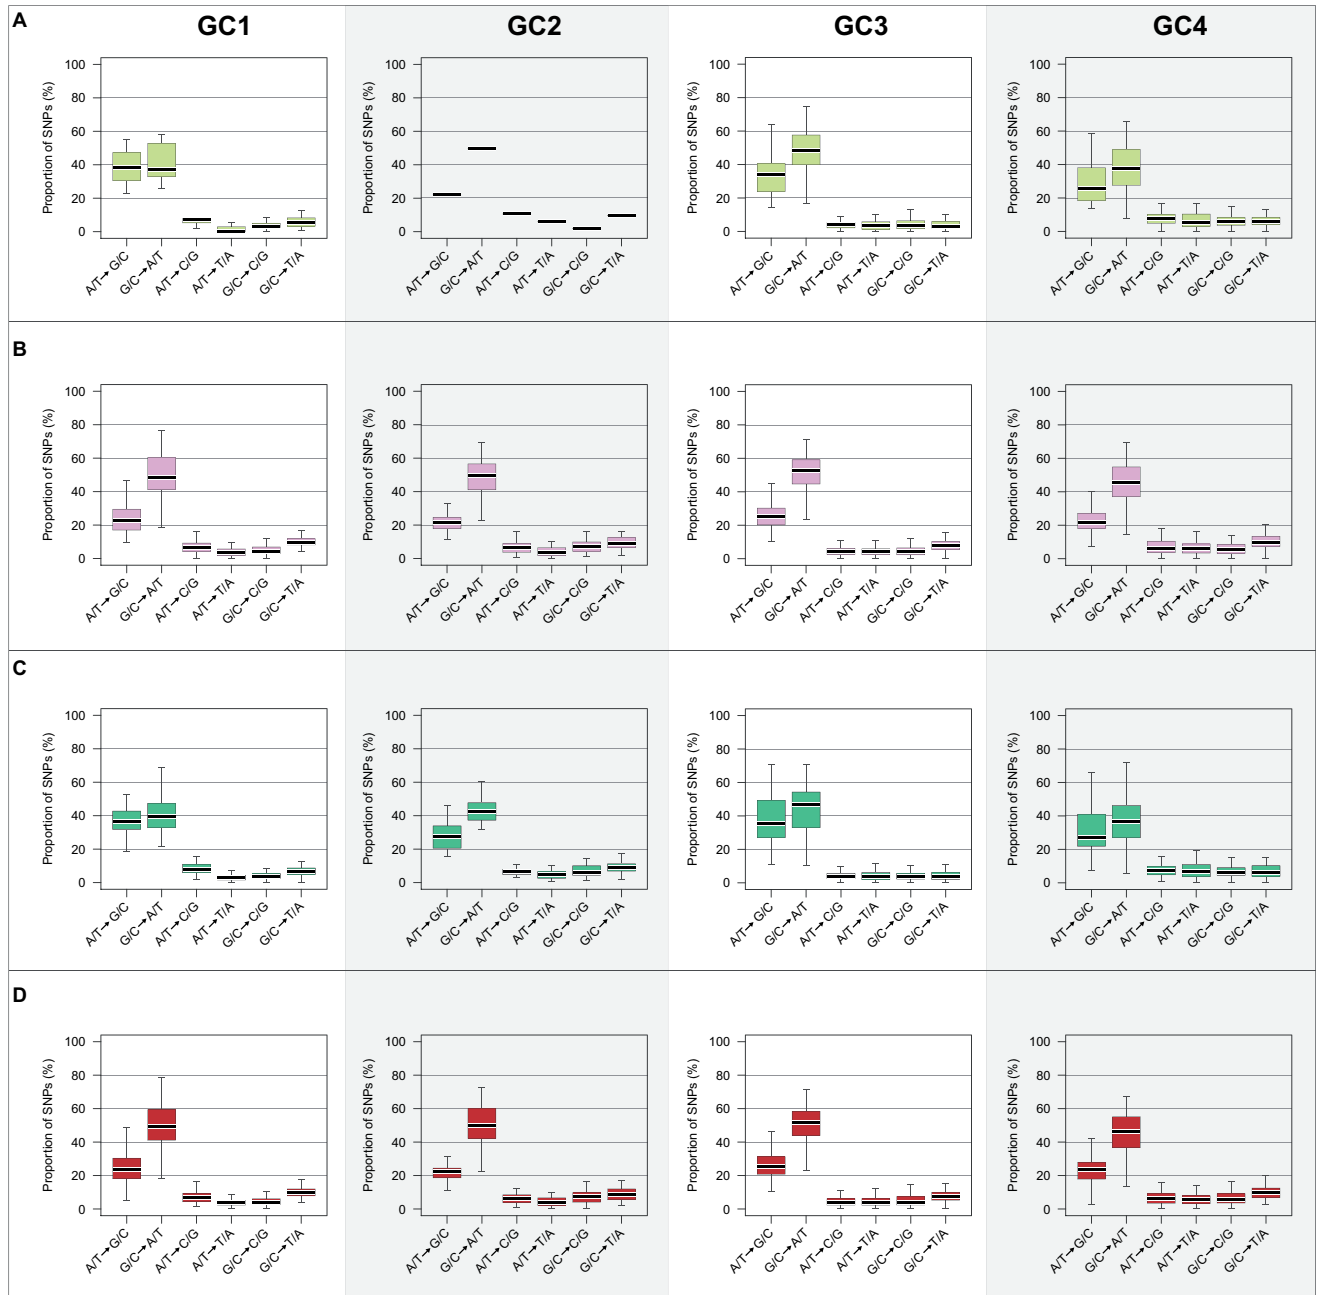

**Figure S1. Comparison of nucleotide changes introduced by recombination and mutation at each codon position.** Cumulative proportions of SNPs at first codon positions (GC1), second codon positions (GC2), third codon positions (GC3), and four-fold degenerate sites (GC4<sub>fold</sub>) for each of the six types of nucleotide changes, as calculated for: **(A)** all alleles introduced by recombination (dark green); **(B)** new alleles introduced recombination (pale green); **(C)** all alleles introduced by mutations (dark red); **(D)** new alleles introduced by mutations (pale red). Values were normalized by the GC-contents at each codon position for each species prior to calculating overall proportions, and species with fewer than 50 polymorphic sites for a given category of alleles were excluded.

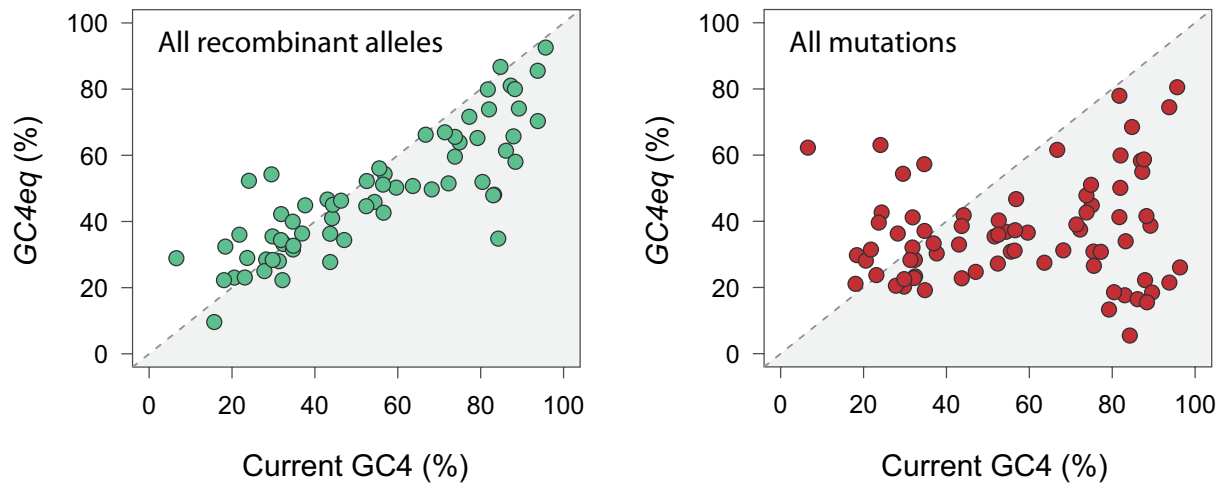

**Figure S2. Equilibrium GC content relative to actual GC content.** *GC4eq* is the expected GC-content at four-fold degenerate sites for a given species when based on all alleles introduced by recombination (dark green, left panel) and all alleles introduced by mutations (dark red, right panel). *GC4eq* values were normalized by the GC-contents at four-fold degenerate sites for each species, and species with fewer than 50 polymorphic sites for any given category of allele were excluded. Points in shaded area below the diagonal denote species that are GC-rich relative to the input of polymorphisms by recombination or mutation.

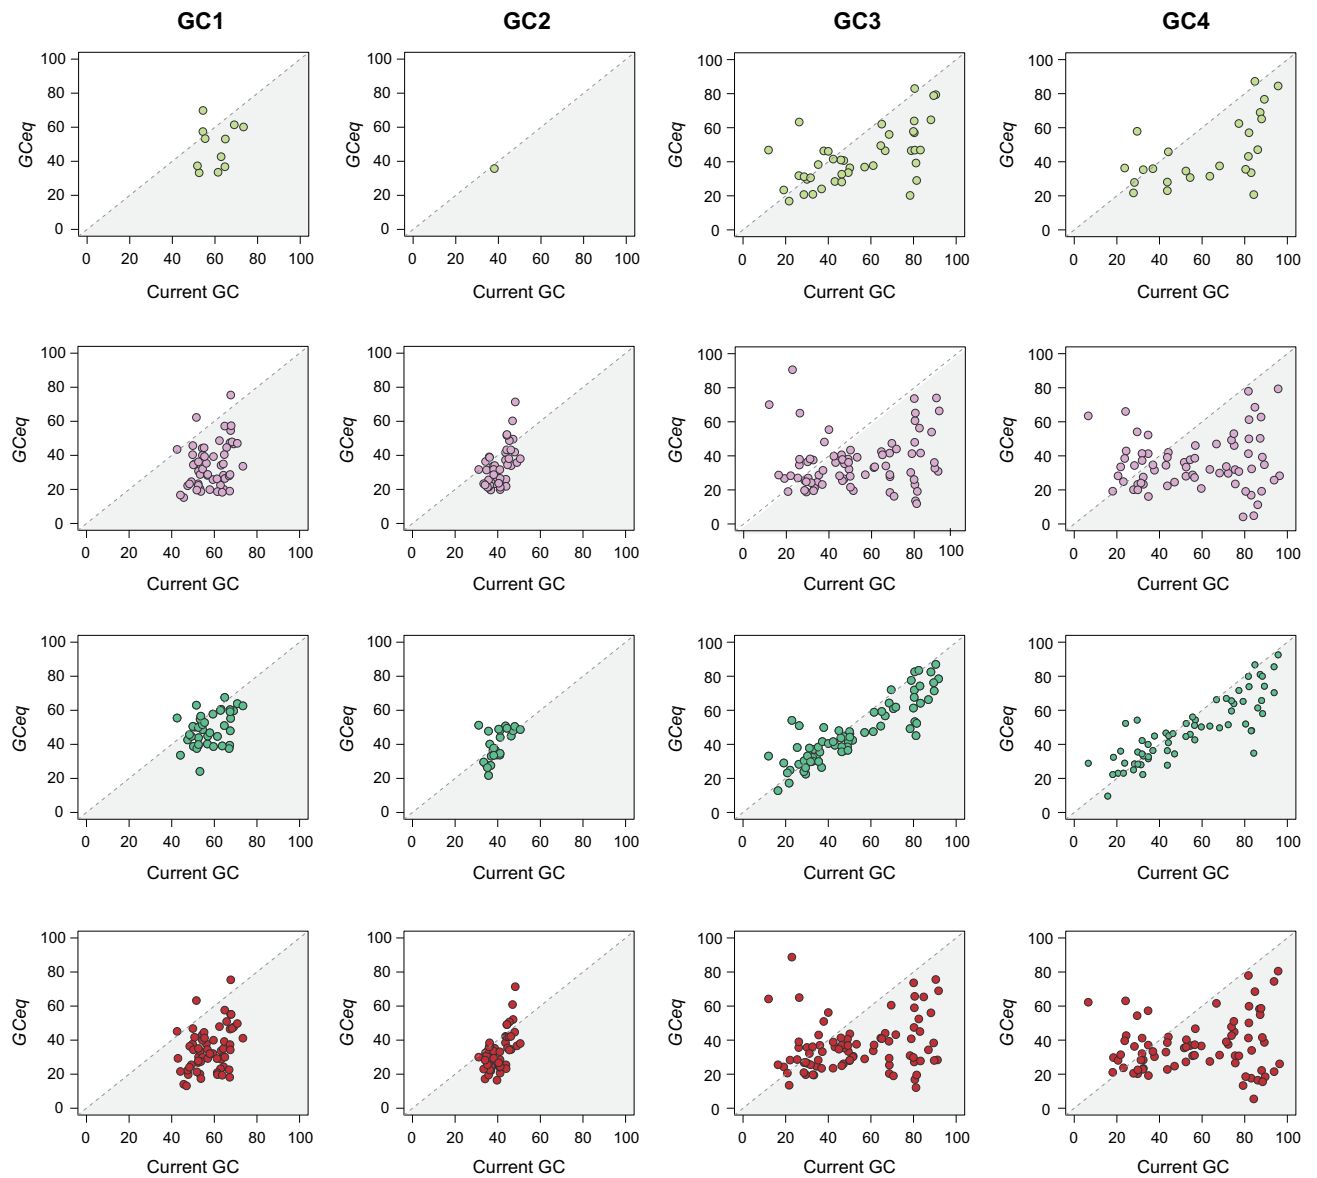

**Figure S3. Equilibrium GC content inferred from new polymorphisms relative to actual GC content at each codon position.**  $GC_{eq}$  is the expected GC-content at first codon positions (GC1), second codon positions (GC2), third codon positions (GC3), and four-fold degenerate sites ( $GC4_{fold}$ ) for a given species when based on new alleles introduced by recombination (pale green), new alleles introduced by mutations (pale red), all alleles introduced by recombination (dark green) and all alleles introduced by mutations (dark red).  $GC_{eq}$  values were normalized by the GC-contents at each codon position for each species, and species with fewer than 50 polymorphic sites for any given category of allele were excluded. Points in shaded area below the diagonal denote species that are GC-rich relative to the input of polymorphisms by recombination or mutation.

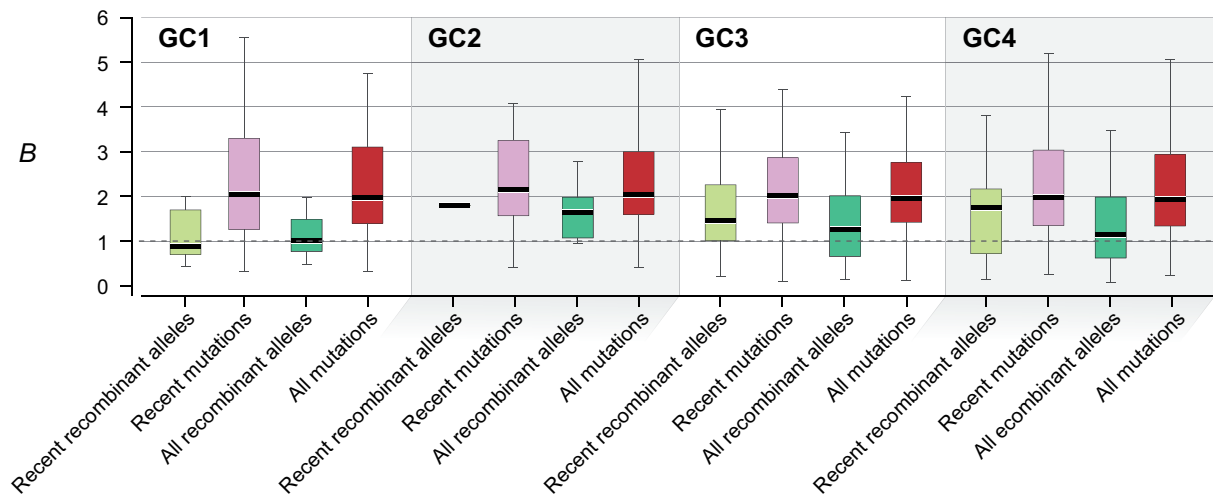

**Figure S4. Impact of recombination and mutations on genomic nucleotide composition and codon usage.** The metric  $B$  represents the number of changes from G or C to A or T relative to the number of changes from A or T to G or C at four-fold degenerate sites.  $B > 1$  indicates an enrichment towards A and T, and  $B < 1$  indicates an enrichment toward G and C. Values shown are for all alleles introduced by recombination (dark green); new alleles introduced recombination (pale green); all alleles introduced by mutations (dark red); new alleles introduced by mutations (pale red). Values were normalized by the GC-contents at the corresponding codon position for each species prior to calculating overall proportions, and species with fewer than 50 polymorphic sites for a given category of alleles were excluded.

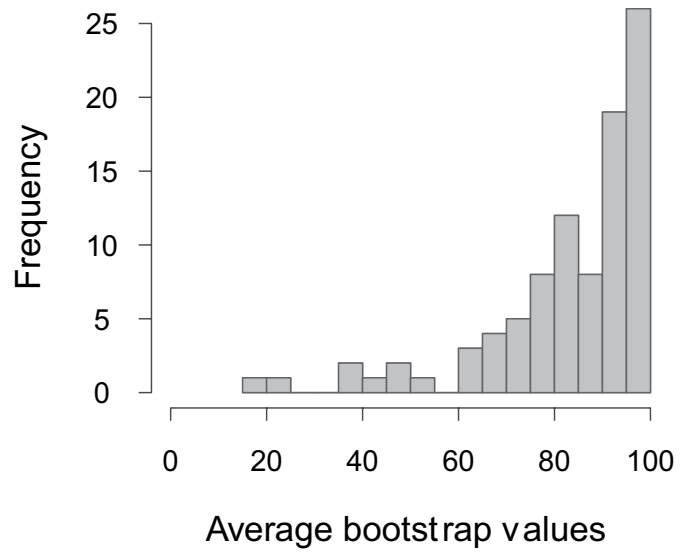

**Figure S5. Distribution of average bootstrap values for the species phylogenies.**

For each species tree, 100 bootstrap replicates were computed, averaged across all nodes to produce an average bootstrap value for a species. The list of average bootstrap values of each species is given in Table S1.

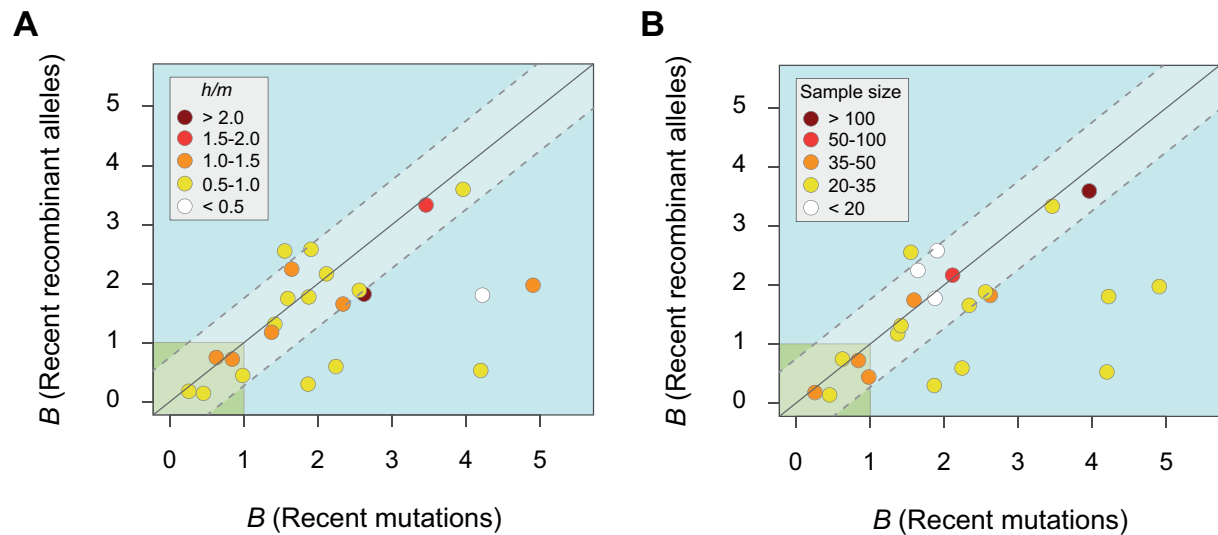

**Figure S6. Nucleotide bias of recent recombinant alleles and recent mutations.**

The metric  $B$  represents the number of changes from G or C to A or T relative to the number of changes from A or T to G or C at four-fold degenerate sites. On each axis, a value of  $B < 1$  indicates an enrichment toward G and C (green area), and value of  $B > 1$  indicates an enrichment towards A and T (blue area). The solid diagonal line indicates identical nucleotide bias for recent recombinant alleles and recent mutations; the dotted lines represent half of the standard deviation. Values were normalized by the GC-contents at four-fold degenerate sites for each species prior to calculating overall proportions, and species with fewer than 50 polymorphic sites for a given category of alleles were excluded. **(A)** The color of dots denotes the recombination rate  $h/m$  for a species, as indicated in the key. **(B)** The color of dots denotes the number of strains for a given species, as indicated in the key.

**Table S1. Description of species and core genome information.**

| Species                                      | Genomes | Distinct strains | Core genes | <i>h/m</i> (average on core genes) | GC content (%) (average on core genes and standard deviation) | p-value  | Spearman's Rho | Average Bootstrap support | Polymorphic sites (%) |
|----------------------------------------------|---------|------------------|------------|------------------------------------|---------------------------------------------------------------|----------|----------------|---------------------------|-----------------------|
| <i>Acinetobacter baumannii</i>               | 1046    | 276              | 49         | 1,26                               | 42.3 (2.98)                                                   | 1,22E-01 | -0,22          | 54,30                     | 40,38                 |
| <b>Acinetobacter pittii</b>                  | 20      | 15               | 2360       | 0,74                               | 40.35 (3.11)                                                  | 7,13E-08 | 0,11           | 97,60                     | 13,75                 |
| <i>Aggregatibacter actinomycetemcomitans</i> | 21      | 20               | 282        | 0,16                               | 48.01 (3.67)                                                  | 8,33E-01 | 0,01           | 97,10                     | 8,63                  |
| <i>Bacillus anthracis</i>                    | 95      | 22               | 2037       | 0,12                               | 36.56 (3.02)                                                  | 2,46E-01 | -0,04          | 83,70                     | 0,13                  |
| <i>Bacillus cereus</i>                       | 168     | 130              | 970        | 1,18                               | 37.26 (3.1)                                                   | 2,33E-03 | 0,10           | 97,20                     | 31,95                 |
| <i>Bacillus subtilis</i>                     | 79      | 54               | 224        | 0,73                               | 44.8 (3.05)                                                   | 2,97E-03 | 0,20           | 90,60                     | 25,18                 |
| <b>Bacillus thuringiensis</b>                | 56      | 36               | 1857       | 0,99                               | 36.97 (3.07)                                                  | 2,73E-01 | -0,03          | 97,00                     | 16,81                 |
| <i>Bacteroides fragilis</i>                  | 93      | 36               | 597        | 0,25                               | 45.21 (3.12)                                                  | 3,38E-01 | 0,04           | 86,90                     | 13,31                 |
| <b>Bifidobacterium longum</b>                | 44      | 28               | 734        | 1,65                               | 61.72 (2.57)                                                  | 2,19E-01 | -0,05          | 71,00                     | 7,91                  |
| <b>Bordetella bronchiseptica</b>             | 64      | 41               | 2340       | 1,30                               | 68.58 (3.06)                                                  | 2,93E-01 | 0,02           | 76,40                     | 2,86                  |
| <i>Borrelia burgdorferi</i>                  | 30      | 25               | 79         | 0,90                               | 30.54 (4.57)                                                  | 4,69E-01 | 0,09           | 83,10                     | 1,94                  |
| <i>Borrelia garinii</i>                      | 22      | 20               | 31         | 0,50                               | 31.96 (3.53)                                                  | 1,73E-01 | 0,26           | 84,20                     | 2,97                  |
| <i>Brucella militensis</i>                   | 64      | 34               | 950        | 0,33                               | 58.49 (3.27)                                                  | 2,71E-01 | 0,04           | 90,80                     | 0,55                  |
| <i>Brucella abortus</i>                      | 150     | 31               | 1498       | 0,38                               | 58.63 (3.2)                                                   | 7,45E-01 | 0,01           | 96,60                     | 0,54                  |
| <i>Brucella suis</i>                         | 51      | 16               | 2124       | 0,37                               | 58.79 (2.93)                                                  | 5,55E-02 | -0,05          | 99,60                     | 0,44                  |
| <i>Burkholderia pseudomallei</i>             | 189     | 120              | 172        | 1,26                               | 67.61 (2.95)                                                  | 6,95E-01 | -0,03          | 37,10                     | 2,50                  |
| <i>Campylobacter jejuni</i>                  | 142     | 117              | 174        | 1,28                               | 32.47 (3.51)                                                  | 4,52E-02 | 0,15           | 88,50                     | 11,27                 |
| <i>Campylobacter coli</i>                    | 72      | 70               | 270        | 1,88                               | 34.3 (2.91)                                                   | 7,32E-01 | 0,02           | 84,10                     | 13,50                 |
| <i>Chlamydia trachomatis</i>                 | 92      | 56               | 752        | 2,76                               | 42.03 (2.2)                                                   | 1,19E-01 | 0,06           | 91,70                     | 1,52                  |
| <i>Chlamydia psittaci</i>                    | 47      | 19               | 127        | 0,30                               | 40.1 (2.33)                                                   | 7,01E-01 | -0,03          | 92,90                     | 35,32                 |
| <i>Clostridium botulinum</i>                 | 53      | 37               | 46         | 0,92                               | 31.32 (3.3)                                                   | 6,24E-01 | -0,08          | 78,00                     | 8,73                  |
| <i>Corynebacterium pseudotuberculosis</i>    | 22      | 18               | 1260       | 0,73                               | 53.3 (3.05)                                                   | 7,37E-01 | 0,01           | 93,30                     | 1,58                  |
| <i>Coxiella burnetii</i>                     | 24      | 16               | 536        | 0,08                               | 44.64 (4.1)                                                   | 3,11E-01 | -0,05          | 92,00                     | 0,76                  |
| <i>Enterobacter cloacae</i>                  | 199     | 99               | 426        | 1,19                               | 55.45 (3.03)                                                  | 9,64E-13 | 0,34           | 79,90                     | 32,74                 |
| <b>Enterobacter aerogenes</b>                | 28      | 21               | 2081       | 0,83                               | 57.15 (3.34)                                                  | 9,20E-01 | 0,00           | 94,50                     | 6,10                  |
| <i>Enterococcus faecalis</i>                 | 362     | 158              | 158        | 1,16                               | 39.56 (2.58)                                                  | 4,52E-01 | 0,06           | 70,30                     | 4,58                  |
| <i>Enterococcus faecium</i>                  | 274     | 165              | 238        | 1,86                               | 40.83 (2.18)                                                  | 4,81E-01 | 0,05           | 61,80                     | 7,30                  |
| <b>Escherichia coli</b>                      | 2961    | 63               | 656        | 0,68                               | 52.49 (2.82)                                                  | 4,04E-01 | 0,03           | 96,20                     | 31,44                 |
| <i>Francisella tularensis</i>                | 67      | 29               | 489        | 0,22                               | 33.87 (3.3)                                                   | 7,81E-01 | 0,01           | 96,80                     | 9,80                  |
| <i>Fusobacterium nucleatum</i>               | 29      | 26               | 708        | 0,88                               | 28.36 (3.3)                                                   | 1,37E-01 | -0,06          | 84,20                     | 19,68                 |
| <b>Gallibacterium anatis</b>                 | 22      | 21               | 1456       | 2,32                               | 41.79 (3.08)                                                  | 6,62E-03 | -0,07          | 90,80                     | 9,47                  |
| <i>Gardnerella vaginalis</i>                 | 36      | 32               | 91         | 0,89                               | 44.49 (3.81)                                                  | 7,32E-04 | 0,35           | 89,60                     | 35,42                 |
| <b>Haemophilus influenzae</b>                | 43      | 38               | 526        | 2,39                               | 39.37 (3.02)                                                  | 8,12E-01 | -0,01          | 88,00                     | 10,51                 |
| <i>Helicobacter pylori</i>                   | 445     | 347              | 50         | 2,47                               | 40.69 (2.55)                                                  | 3,83E-01 | 0,13           | 46,30                     | 36,81                 |
| <i>Kingella kingae</i>                       | 42      | 42               | 914        | 1,53                               | 48.48 (3.65)                                                  | 4,22E-01 | -0,03          | 96,50                     | 3,29                  |
| <i>Klebsiella pneumoniae</i>                 | 526     | 178              | 344        | 0,76                               | 57.85 (3.68)                                                  | 1,25E-01 | 0,08           | 66,60                     | 12,65                 |
| <i>Lactobacillus rhamnosus</i>               | 31      | 21               | 286        | 1,13                               | 47.95 (3.18)                                                  | 2,94E-01 | 0,06           | 90,40                     | 5,73                  |
| <b>Lactobacillus casei</b>                   | 27      | 20               | 869        | 1,33                               | 48.16 (2.71)                                                  | 3,38E-01 | -0,03          | 99,30                     | 3,07                  |
| <i>Lactobacillus paracasei</i>               | 43      | 38               | 133        | 0,86                               | 47.28 (2.81)                                                  | 5,91E-01 | -0,05          | 82,30                     | 3,35                  |



|                                          |      |     |      |      |              |          |       |        |       |
|------------------------------------------|------|-----|------|------|--------------|----------|-------|--------|-------|
| <i>Lactobacillus plantarum</i>           | 28   | 25  | 702  | 0,29 | 46.71 (3.31) | 1,38E-04 | -0,14 | 67,00  | 25,30 |
| <i>Lactococcus lactis</i>                | 39   | 35  | 382  | 0,68 | 37.93 (3.32) | 4,87E-01 | 0,04  | 90,80  | 13,67 |
| <i>Legionella pneumophila</i>            | 74   | 44  | 510  | 0,66 | 39.54 (2.91) | 2,38E-01 | 0,05  | 95,70  | 13,36 |
| <i>Leptospira interrogans</i>            | 198  | 55  | 217  | 0,81 | 38.28 (3.53) | 7,85E-01 | 0,02  | 63,00  | 3,99  |
| <i>Leptospira kirschneri</i>             | 23   | 17  | 1865 | 1,67 | 38.33 (3.24) | 2,66E-01 | -0,03 | 90,90  | 3,33  |
| <b><i>Leptospira santarosai</i></b>      | 23   | 22  | 1899 | 1,17 | 43.6 (2.99)  | 1,93E-01 | 0,03  | 90,30  | 2,12  |
| <i>Listeria monocytogenes</i>            | 331  | 63  | 427  | 0,75 | 39.31 (2.77) | 9,07E-01 | 0,01  | 75,80  | 11,47 |
| <b><i>Methanoscarcina mazei</i></b>      | 63   | 30  | 1708 | 3,61 | 45.93 (3.44) | 3,90E-01 | 0,02  | 94,40  | 2,42  |
| <i>Mycobacterium tuberculosis</i>        | 1817 | 143 | 38   | 0,19 | 63.04 (1.74) | 5,04E-02 | -0,32 | 18,10  | 1,15  |
| <b><i>Mycobacterium abscessus</i></b>    | 79   | 24  | 1898 | 2,24 | 65.01 (2.56) | 4,54E-01 | -0,02 | 88,80  | 5,13  |
| <i>Mycobacterium africanum</i>           | 28   | 20  | 3336 | 0,18 | 65.85 (3.09) | 8,45E-01 | 0,00  | 100,00 | 0,12  |
| <i>Mycobacterium avium</i>               | 58   | 34  | 186  | 1,34 | 68.17 (2.58) | 6,20E-01 | 0,04  | 93,00  | 1,93  |
| <i>Mycobacterium bovis</i>               | 39   | 19  | 2085 | 0,33 | 65.31 (3.04) | 2,69E-01 | 0,03  | 92,10  | 0,16  |
| <i>Neisseria meningitidis</i>            | 200  | 153 | 318  | 4,28 | 54.56 (4.82) | 3,88E-01 | 0,05  | 85,00  | 10,46 |
| <i>Neisseria gonorrhoeae</i>             | 23   | 19  | 1163 | 2,08 | 54.94 (4.98) | 1,92E-02 | 0,08  | 87,80  | 0,95  |
| <i>Oenococcus oeni</i>                   | 58   | 36  | 484  | 1,16 | 39.85 (3.62) | 6,81E-01 | -0,02 | 92,20  | 2,02  |
| <i>Pasteurella multocida</i>             | 27   | 22  | 182  | 0,76 | 41.8 (2.86)  | 5,01E-01 | 0,05  | 80,40  | 3,33  |
| <b><i>Pectobacterium carotovorum</i></b> | 35   | 34  | 1852 | 1,08 | 53.84 (3.53) | 1,62E-03 | 0,07  | 97,20  | 23,04 |
| <i>Peptoclostridium difficile</i>        | 254  | 81  | 192  | 0,71 | 30.13 (2.9)  | 5,02E-01 | -0,05 | 71,90  | 5,05  |
| <i>Prochlorococcus marinus</i>           | 31   | 26  | 289  | 0,89 | 36.77 (2.77) | 1,97E-02 | 0,14  | 89,10  | 47,02 |
| <i>Propionibacterium acnes</i>           | 92   | 78  | 222  | 0,82 | 60.25 (2.88) | 9,41E-01 | 0,01  | 65,20  | 4,66  |
| <i>Pseudomonas aeruginosa</i>            | 725  | 310 | 104  | 0,83 | 63.83 (3.61) | 3,07E-01 | 0,10  | 43,60  | 7,79  |
| <i>Pseudomonas fluorescens</i>           | 57   | 54  | 1492 | 2,37 | 61.48 (2.98) | 7,25E-03 | 0,07  | 94,80  | 42,69 |
| <b><i>Pseudomonas putida</i></b>         | 35   | 33  | 526  | 1,21 | 62.15 (3.07) | 9,03E-01 | -0,01 | 96,90  | 38,61 |
| <b><i>Pseudomonas stutzeri</i></b>       | 22   | 22  | 1620 | 1,32 | 64.36 (3.16) | 7,56E-21 | -0,23 | 98,10  | 42,03 |
| <i>Pseudomonas syringae</i>              | 98   | 57  | 394  | 1,07 | 58.38 (3.14) | 8,44E-07 | 0,25  | 92,40  | 33,70 |
| <i>Ralstonia solanacearum</i>            | 29   | 24  | 1152 | 0,24 | 67.26 (3.16) | 1,27E-02 | -0,07 | 100,00 | 12,37 |
| <b><i>Rhizobium leguminosarum</i></b>    | 30   | 30  | 2497 | 0,75 | 62.87 (2.56) | 6,17E-01 | 0,01  | 97,90  | 33,52 |
| <b><i>Rhodococcus fascians</i></b>       | 21   | 20  | 2136 | 0,39 | 65.04 (2.16) | 3,75E-02 | -0,05 | 99,30  | 32,25 |
| <b><i>Salinispora arenicola</i></b>      | 47   | 41  | 1171 | 0,55 | 68.99 (2.62) | 5,29E-02 | -0,06 | 79,10  | 4,97  |
| <b><i>Salinispora pacifica</i></b>       | 38   | 32  | 2667 | 0,51 | 70.42 (3.04) | 7,10E-09 | -0,11 | 99,30  | 18,47 |
| <i>Salmonella enterica</i>               | 1139 | 64  | 279  | 0,69 | 53.75 (3.56) | 6,20E-02 | 0,11  | 63,80  | 13,37 |
| <b><i>Serratia marcescens</i></b>        | 36   | 23  | 1853 | 0,72 | 61.04 (3.99) | 9,75E-01 | 0,00  | 98,10  | 12,39 |
| <b><i>Sinorhizobium meliloti</i></b>     | 30   | 28  | 2294 | 1,38 | 63.2 (2.55)  | 3,45E-01 | -0,02 | 70,70  | 2,83  |
| <i>Staphylococcus aureus</i>             | 4221 | 370 | 30   | 0,34 | 34.23 (3.27) | 5,09E-01 | -0,13 | 24,90  | 6,29  |
| <i>Staphylococcus epidermidis</i>        | 104  | 72  | 691  | 1,31 | 33.78 (3.01) | 8,13E-01 | -0,01 | 82,20  | 5,14  |
| <i>Stenotrophomonas maltophilia</i>      | 29   | 27  | 119  | 0,85 | 66.28 (2.75) | 4,61E-01 | 0,07  | 83,10  | 31,72 |
| <i>Streptococcus pneumoniae</i>          | 327  | 237 | 118  | 1,48 | 42.62 (3.02) | 2,14E-01 | 0,12  | 72,50  | 8,29  |
| <i>Streptococcus agalactiae</i>          | 316  | 136 | 79   | 1,14 | 36.18 (3.15) | 3,03E-01 | -0,12 | 45,80  | 2,91  |
| <b><i>Streptococcus</i></b>              | 41   | 39  | 362  | 1,28 | 43.18 (2.79) | 2,43E-05 | 0,22  | 98,10  | 37,44 |

|                                       |     |     |      |      |              |          |       |        |       |
|---------------------------------------|-----|-----|------|------|--------------|----------|-------|--------|-------|
| <i>mitis</i>                          |     |     |      |      |              |          |       |        |       |
| <b><i>Streptococcus mutans</i></b>    | 166 | 145 | 861  | 0,99 | 38.17 (3.17) | 3,72E-01 | -0,03 | 89,20  | 5,35  |
| <i>Streptococcus pyogenes</i>         | 234 | 54  | 264  | 0,93 | 39.78 (3.19) | 4,72E-02 | 0,12  | 81,80  | 4,19  |
| <b><i>Streptococcus sanguinis</i></b> | 24  | 21  | 791  | 0,93 | 46.24 (3.02) | 4,26E-08 | 0,19  | 92,80  | 25,08 |
| <i>Streptococcus sobrinus</i>         | 48  | 39  | 87   | 3,92 | 44.53 (3.8)  | 9,86E-02 | 0,21  | 82,00  | 3,27  |
| <i>Streptococcus suis</i>             | 470 | 231 | 368  | 1,36 | 43.05 (3.91) | 4,32E-12 | 0,35  | 78,30  | 34,95 |
| <i>Sulfolobus islandicus</i>          | 20  | 18  | 1316 | 0,71 | 35.39 (3.06) | 7,91E-01 | -0,01 | 98,70  | 1,80  |
| <i>Vibrio cholerae</i>                | 278 | 66  | 114  | 2,16 | 48.18 (3.09) | 3,39E-01 | -0,09 | 66,90  | 9,70  |
| <b><i>Vibrio cyclitrophicus</i></b>   | 21  | 19  | 3354 | 2,12 | 45.03 (2.41) | 9,55E-02 | 0,03  | 79,90  | 3,10  |
| <i>Vibrio parahaemolyticus</i>        | 76  | 75  | 63   | 0,72 | 46.43 (2.32) | 6,23E-01 | 0,07  | 35,80  | 4,16  |
| <i>Vibrio vulnificus</i>              | 31  | 23  | 95   | 1,83 | 48.21 (3.0)  | 6,23E-02 | -0,19 | 75,50  | 8,67  |
| <i>Xanthomonas axonopodis</i>         | 90  | 29  | 1046 | 0,56 | 64.96 (2.9)  | 4,00E-01 | 0,03  | 96,80  | 11,03 |
| <i>Xanthomonas campestris</i>         | 22  | 16  | 1355 | 0,34 | 65.88 (2.97) | 1,23E-13 | -0,20 | 100,00 | 23,43 |
| <i>Xanthomonas citri</i>              | 51  | 21  | 1867 | 0,58 | 65.51 (3.07) | 4,15E-01 | 0,02  | 99,30  | 1,47  |
| <i>Yersinia pseudotuberculosis</i>    | 23  | 16  | 2888 | 0,89 | 49.04 (4.34) | 1,02E-01 | 0,03  | 99,60  | 0,91  |

We estimated the recombination rate  $h/m$  as the ratio of homoplastic ( $h$ ) to non-homoplastic ( $m$ ) alleles inferred along the core genome of each species. Homoplasies were defined with the distance-based method (see Materials and Methods). Spearman coefficients Rho and  $p$ -values were estimated by correlating the recombination rate  $h/m$  relative to the GC content of the core genes for each species. Species in bold correspond to the species displayed in Figures 6 and S6. Average bootstrap supports are defined as the average of bootstrap values estimated over all the nodes of each species tree, which were built with a maximum likelihood approach on the concatenate of core genes (see Materials and Methods).

**Table S2. Identifying recombinant alleles in simulated data sets.**

| <i>N=100, rec=10, m=1</i>  |           |             | <i>N=100, rec=50, m=1</i>  |          |             | <i>N=100, rec=100, m=1</i>  |          |             |
|----------------------------|-----------|-------------|----------------------------|----------|-------------|-----------------------------|----------|-------------|
| Generations                | Inferred  | Recombinant | Generations                | Inferred | Recombinant | Generations                 | Inferred | Recombinant |
| G2000                      | 10        | 10          | G2000                      | 18       | 18          | G2000                       | 18       | 18          |
| <b>G5000</b>               | <b>21</b> | <b>20</b>   | G5000                      | 36       | 36          | G5000                       | 48       | 48          |
| G10000                     | 14        | 14          | G10000                     | 89       | 89          | G10000                      | 57       | 57          |
| G12000                     | 2         | 2           | G12000                     | 81       | 81          | G12000                      | 57       | 57          |
| G15000                     | 22        | 22          | G15000                     | 139      | 139         | G15000                      | 90       | 90          |
| G18000                     | 14        | 14          | G18000                     | 12       | 12          | G18000                      | 37       | 37          |
| G20000                     | 21        | 21          | G20000                     | 56       | 56          | G20000                      | 126      | 126         |
| G22000                     | 8         | 8           | G22000                     | 40       | 40          | G22000                      | 129      | 129         |
| G25000                     | 68        | 68          | G25000                     | 10       | 10          | G25000                      | 16       | 16          |
| <b>G30000</b>              | <b>17</b> | <b>16</b>   | G30000                     | 49       | 49          | G30000                      | 106      | 106         |
| <i>N=100, rec=10, m=10</i> |           |             | <i>N=100, rec=50, m=10</i> |          |             | <i>N=100, rec=100, m=10</i> |          |             |
| Generations                | Inferred  | Recombinant | Generations                | Inferred | Recombinant | Generations                 | Inferred | Recombinant |
| G2000                      | 317       | 317         | G2000                      | 433      | 433         | G2000                       | 2358     | 2358        |
| G5000                      | 96        | 96          | G5000                      | 575      | 575         | G5000                       | 600      | 600         |
| G10000                     | 306       | 306         | G10000                     | 681      | 681         | G10000                      | 1544     | 1544        |
| G12000                     | 626       | 626         | G12000                     | 1616     | 1616        | G12000                      | 1453     | 1453        |
| G15000                     | 82        | 82          | G15000                     | 741      | 741         | G15000                      | 1540     | 1540        |
| G18000                     | 358       | 358         | G18000                     | 755      | 755         | G18000                      | 1918     | 1918        |
| G20000                     | 651       | 651         | G20000                     | 428      | 428         | G20000                      | 1641     | 1641        |
| G22000                     | 197       | 197         | G22000                     | 355      | 355         | G22000                      | 742      | 742         |
| G25000                     | 223       | 223         | G25000                     | 1502     | 1502        | G25000                      | 1848     | 1848        |
| G30000                     | 67        | 67          | G30000                     | 744      | 744         | G30000                      | 1687     | 1687        |
| <i>N=500, rec=10, m=1</i>  |           |             | <i>N=500, rec=50, m=1</i>  |          |             | <i>N=500, rec=100, m=1</i>  |          |             |
| Generations                | Inferred  | Recombinant | Generations                | Inferred | Recombinant | Generations                 | Inferred | Recombinant |
| G2000                      | 54        | 54          | G2000                      | 847      | 847         | G2000                       | 775      | 775         |
| G5000                      | 26        | 26          | G5000                      | 538      | 538         | G5000                       | 674      | 674         |
| G10000                     | 163       | 163         | G10000                     | 784      | 784         | G10000                      | 394      | 394         |
| G12000                     | 53        | 53          | G12000                     | 320      | 320         | G12000                      | 527      | 527         |
| G15000                     | 67        | 67          | G15000                     | 235      | 235         | G15000                      | 146      | 146         |
| G18000                     | 207       | 207         | G18000                     | 821      | 821         | G18000                      | 283      | 283         |
| G20000                     | 146       | 146         | G20000                     | 316      | 316         | G20000                      | 458      | 458         |
| G22000                     | 105       | 105         | G22000                     | 499      | 499         | G22000                      | 931      | 931         |
| G25000                     | 58        | 58          | G25000                     | 208      | 208         | G25000                      | 448      | 448         |
| G30000                     | 424       | 424         | G30000                     | 218      | 218         | G30000                      | 380      | 380         |
| <i>N=500, rec=10, m=10</i> |           |             | <i>N=500, rec=50, m=10</i> |          |             | <i>N=500, rec=100, m=10</i> |          |             |
| Generations                | Inferred  | Recombinant | Generations                | Inferred | Recombinant | Generations                 | Inferred | Recombinant |
| G2000                      | 786       | 786         | G2000                      | 5214     | 5214        | G2000                       | 6814     | 6814        |
| G5000                      | 4151      | 4151        | G5000                      | 2585     | 2585        | G5000                       | 5753     | 5753        |
| G10000                     | 880       | 880         | G10000                     | 8977     | 8977        | G10000                      | 5662     | 5662        |
| G12000                     | 2517      | 2517        | G12000                     | 6104     | 6104        | G12000                      | 7214     | 7214        |
| G15000                     | 931       | 931         | G15000                     | 3100     | 3100        | G15000                      | 7151     | 7151        |
| G18000                     | 1224      | 1224        | G18000                     | 2572     | 2572        | G18000                      | 8866     | 8866        |
| G20000                     | 1313      | 1313        | G20000                     | 5577     | 5577        | G20000                      | 6326     | 6326        |
| G22000                     | 846       | 846         | G22000                     | 3462     | 3462        | G22000                      | 8495     | 8495        |
| G25000                     | 1791      | 1791        | G25000                     | 5289     | 5289        | G25000                      | 6002     | 6002        |
| G30000                     | 1214      | 1214        | G30000                     | 4319     | 4319        | G30000                      | 6852     | 6852        |
